# Supplementary material for: Temporal trends of main reproductive characteristics in ten urban and rural regions of China: the China Kadoorie Biobank study of 300 000 women
Source: PubMed Central journal article supplement (PMC4121552; doi:10.1093/ije/dyu035), 2014-03-17
Supplement: supp_dyu035_ije-2013-06-0615-File007.pdf [file supp_dyu035_ije-2013-06-0615-File007.pdf]

**Patterns and temporal trends of main reproductive characteristics in urban and rural populations of China: China Kadoorie Biobank study of 300,000 women**

**Supplementary material**

**Supplementary figure 1. Locations of the China Kadoorie Biobank recruitment centres**

**Supplementary figure 2. Time trends in mean age at menarche, by education separately in (a) urban; (b) rural areas**

**Supplementary figure 3. Time trends in number of live births, by education separately in (a) urban; (b) rural areas**

Among women with at least one live birth.

**Supplementary figure 4. Time trends in mean age at first birth, by education separately in (a) urban; (b) rural areas**

Among women with at least one live birth.

**Supplementary figure 5. Time trends in years between first and second birth, by education separately in (a) urban; (b) rural areas**

Among women with at least two live births.

**Supplementary figure 6. Time trends in mean duration of breast-feeding, by education separately in (a) urban; (b) rural areas**

Among women who had ever breastfed.

**Supplementary figure 7. Time trends in induced abortion, by education  
separately in (a) urban; (b) rural areas**

% experiencing abortion = number of women with at least one abortion/total number  
of women

**Supplementary figure 8. Time trends in spontaneous abortion, by education**

% experiencing abortion = number of women with at least one abortion/total number  
of women

**Supplementary table 1. Demographic and reproductive characteristics in each  
of the 10 areas**

**Supplementary figure 1: Locations of the China Kadoorie Biobank recruitment centres**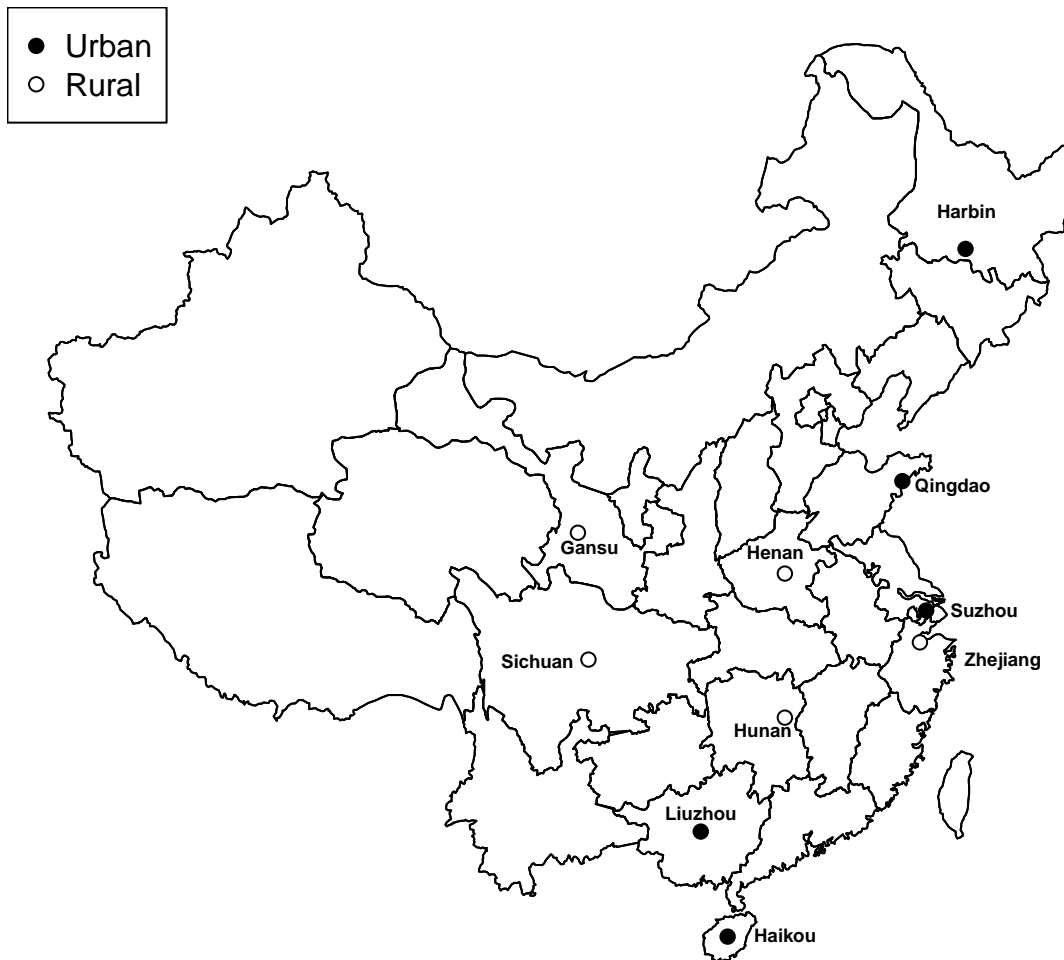

Supplementary Figure 2. Time trends in mean age at menarche in urban & rural regions, by education

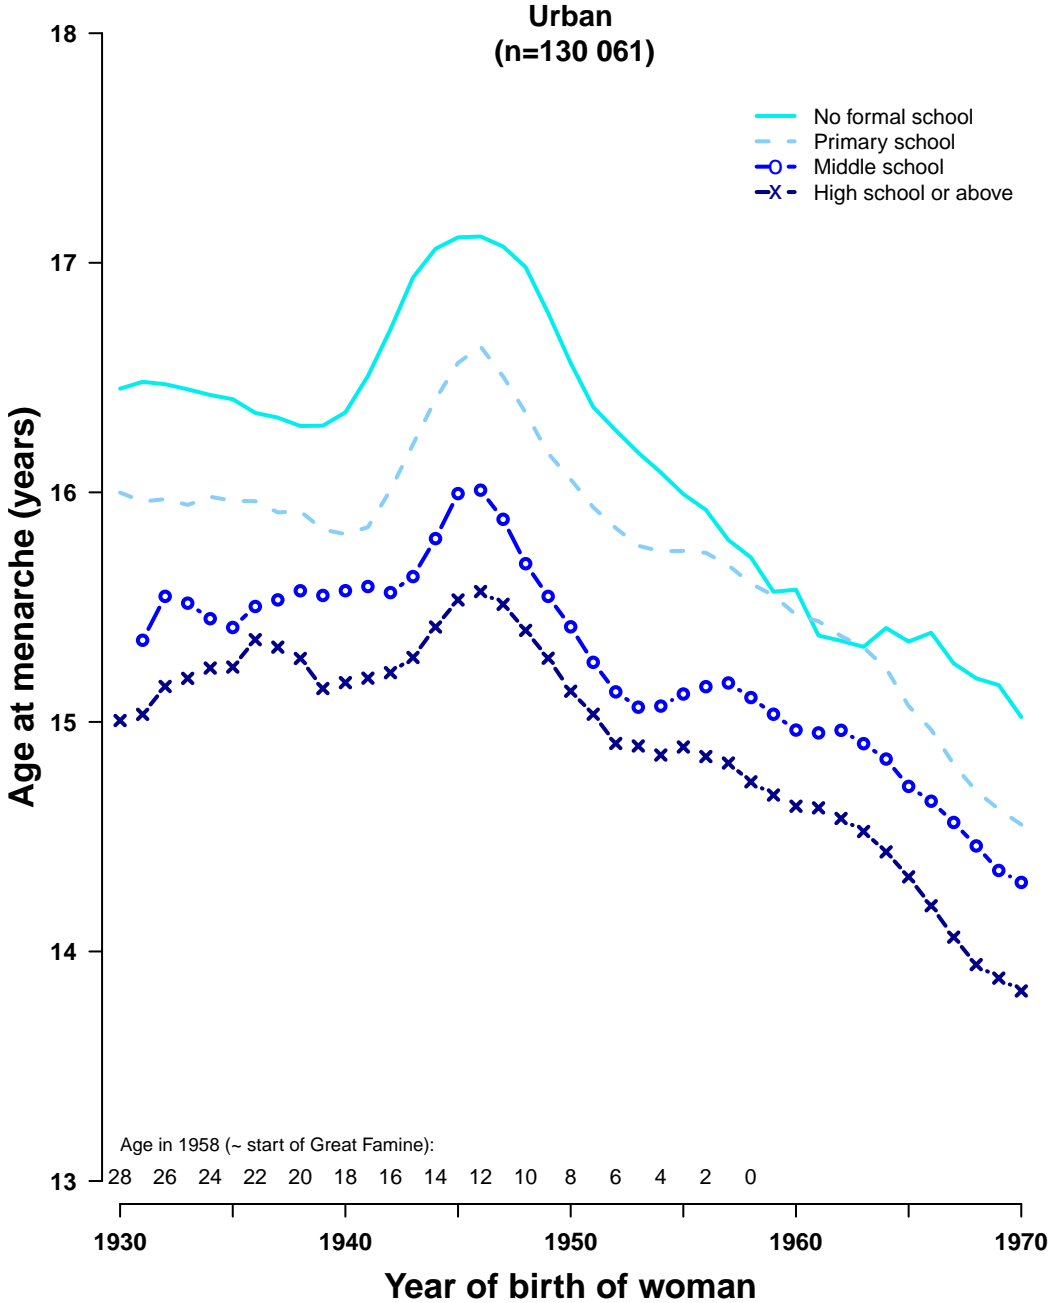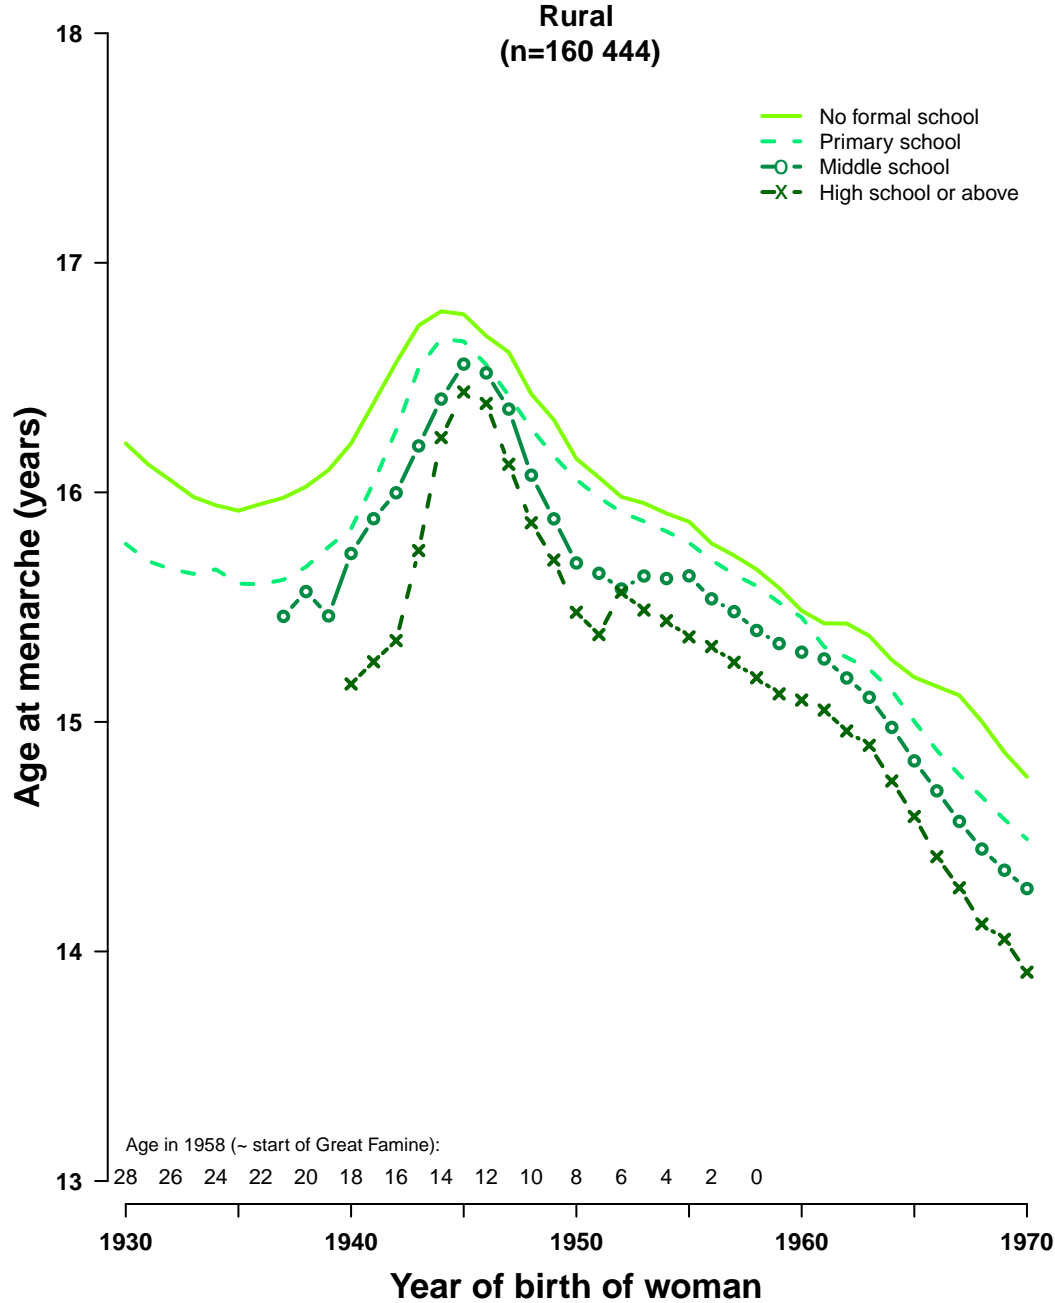

Supplementary Figure 3. Time trends in number of live births in urban &amp; rural, by education

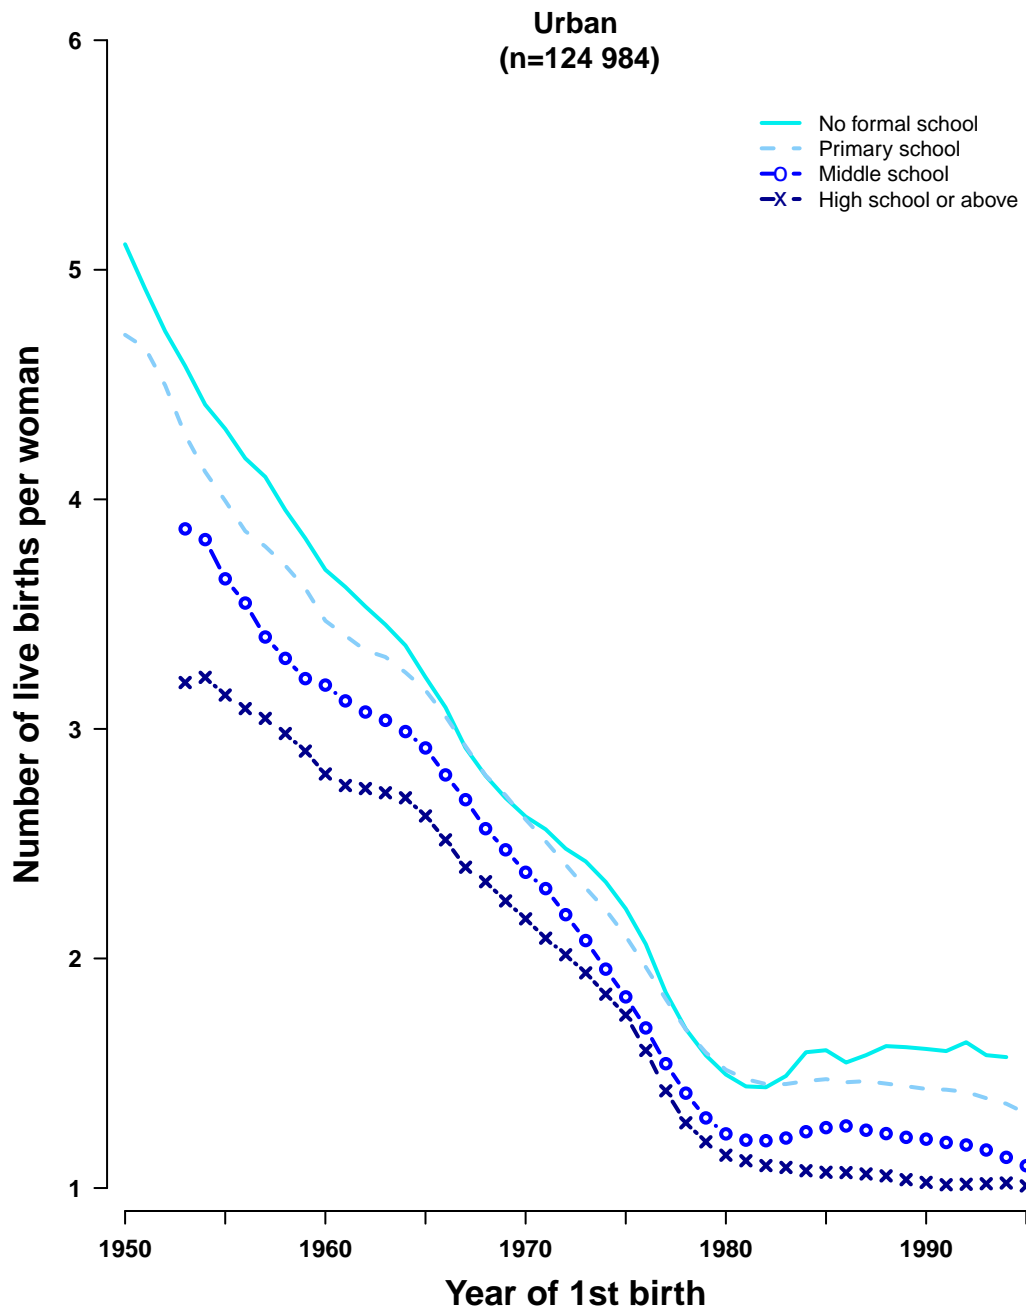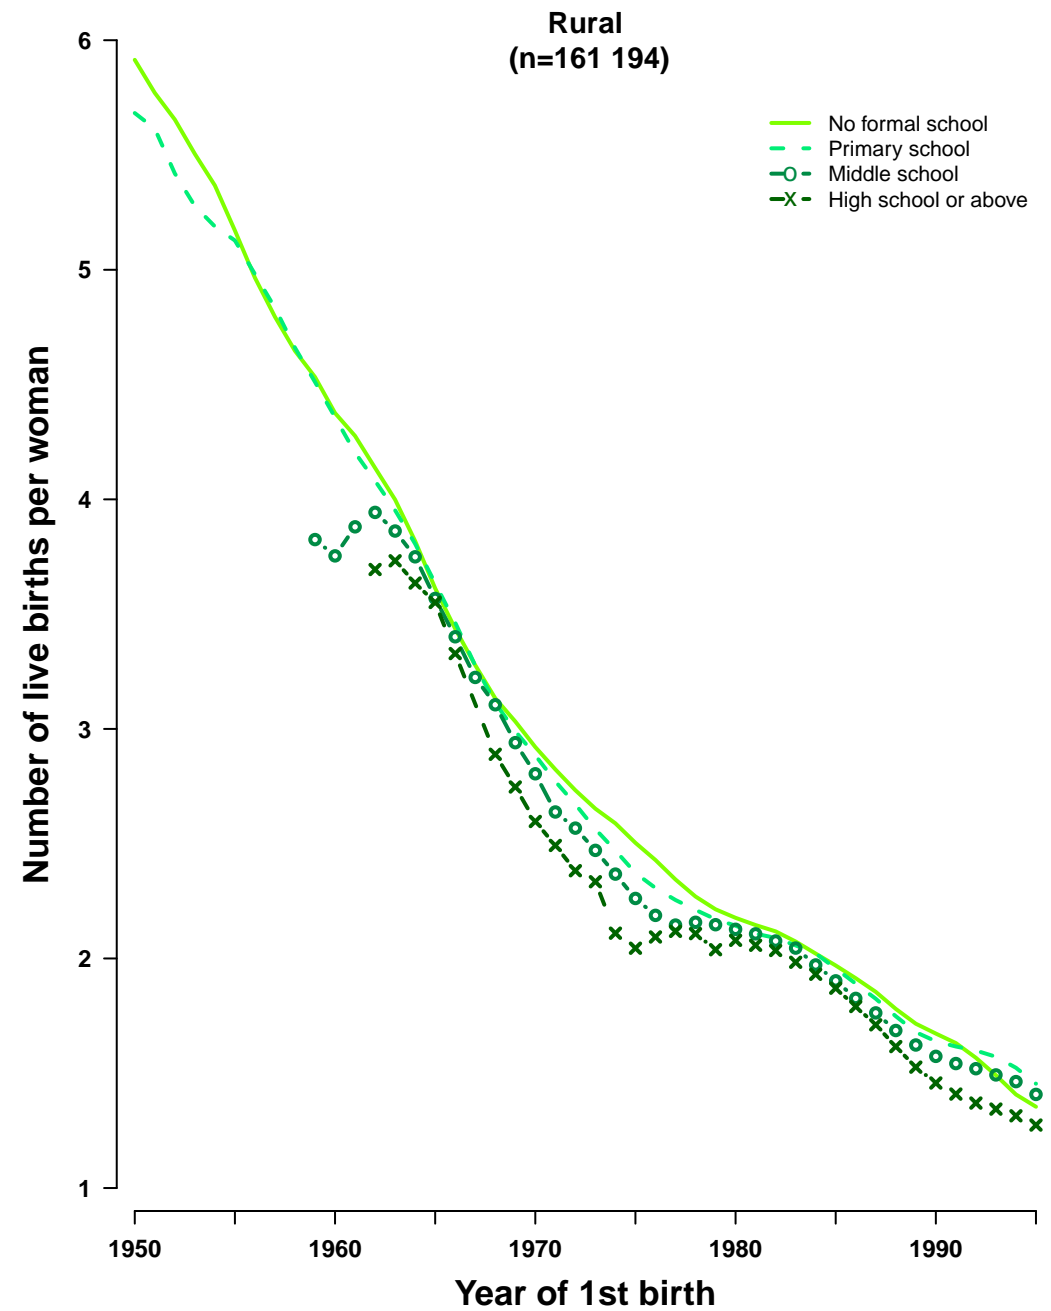

Supplementary Figure 4. Time trends in mean age at 1st birth in urban & rural, by education

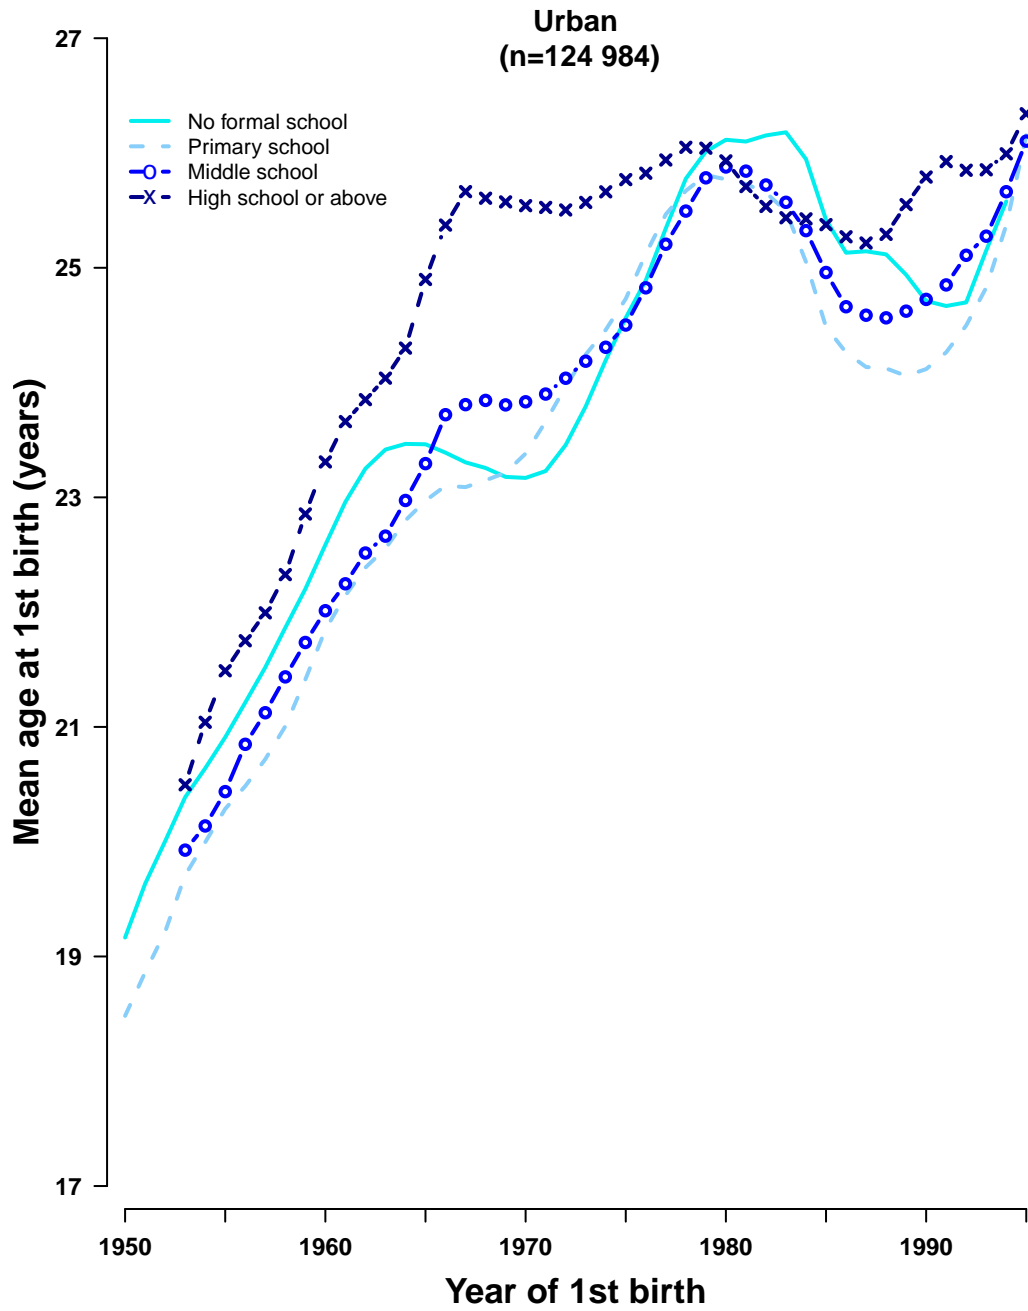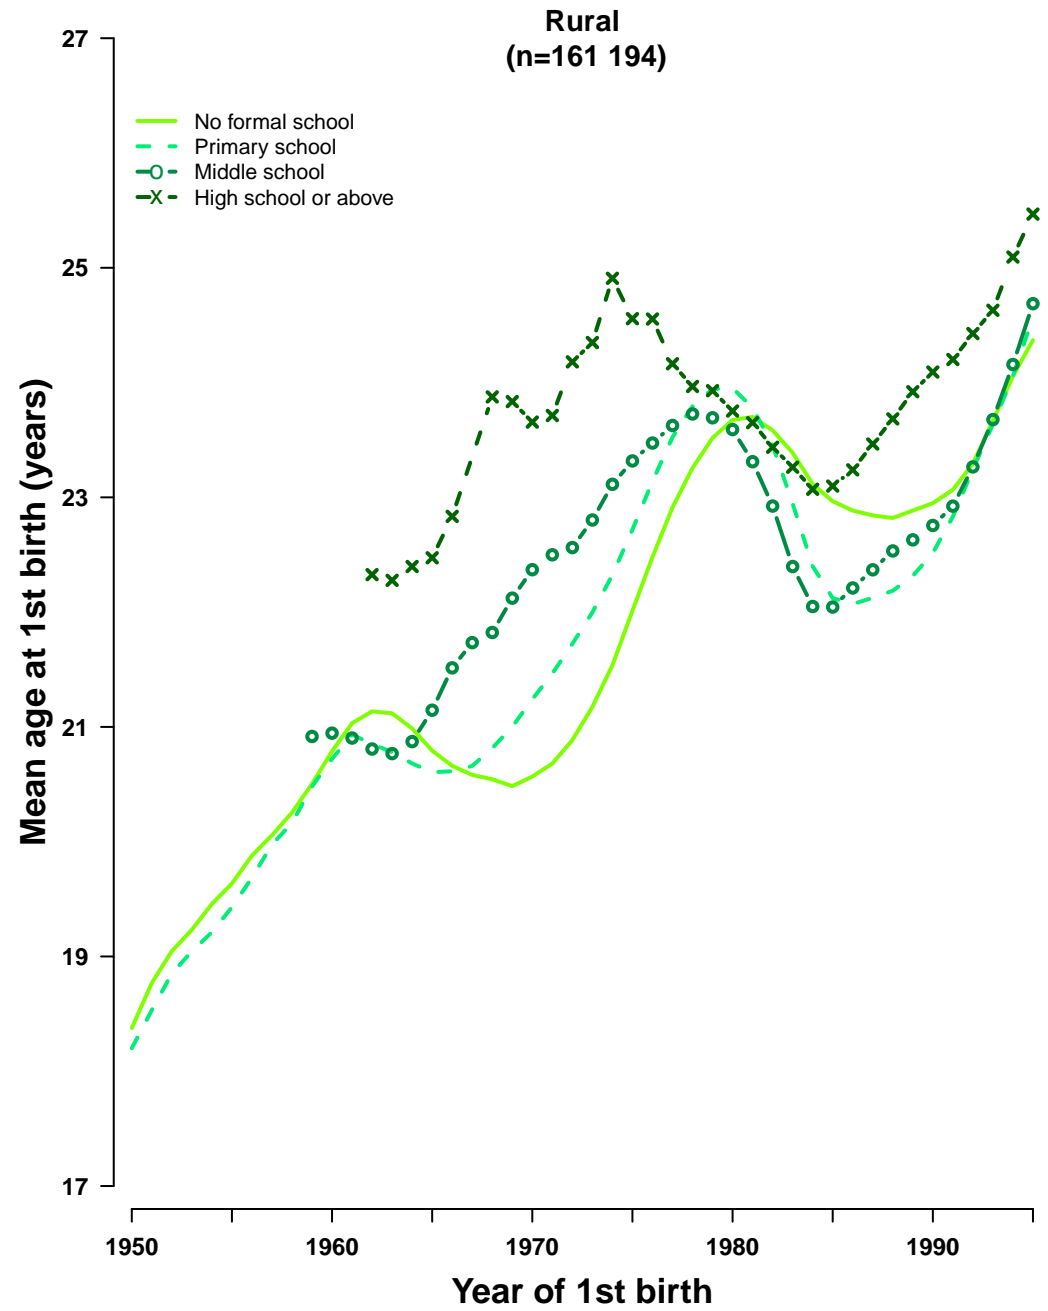

Supplementary Figure 5. Time trends in years between 1st &amp; 2nd birth in urban &amp; rural, by education

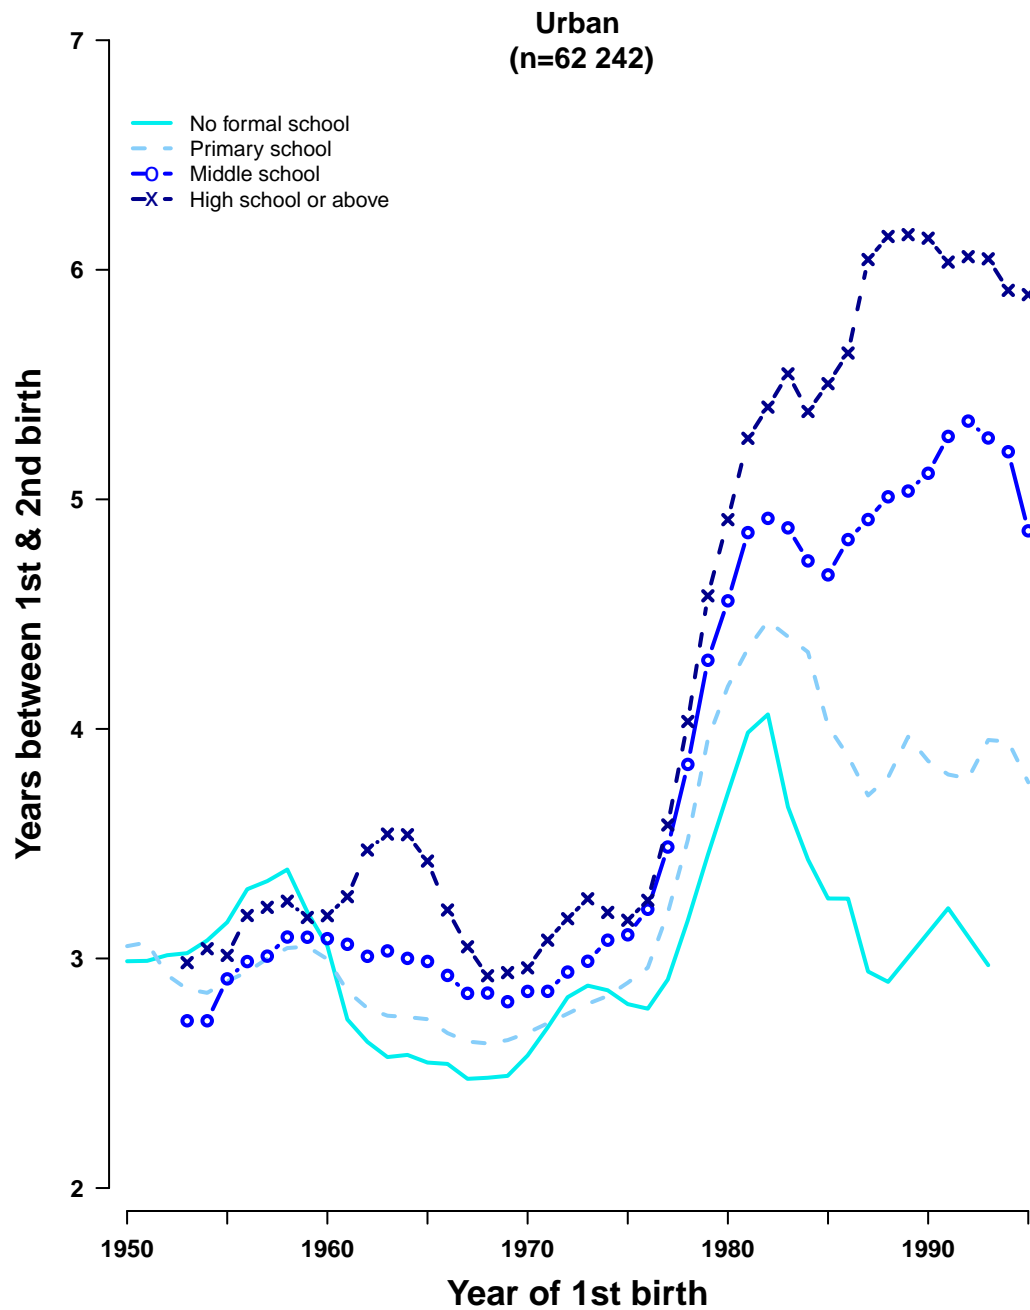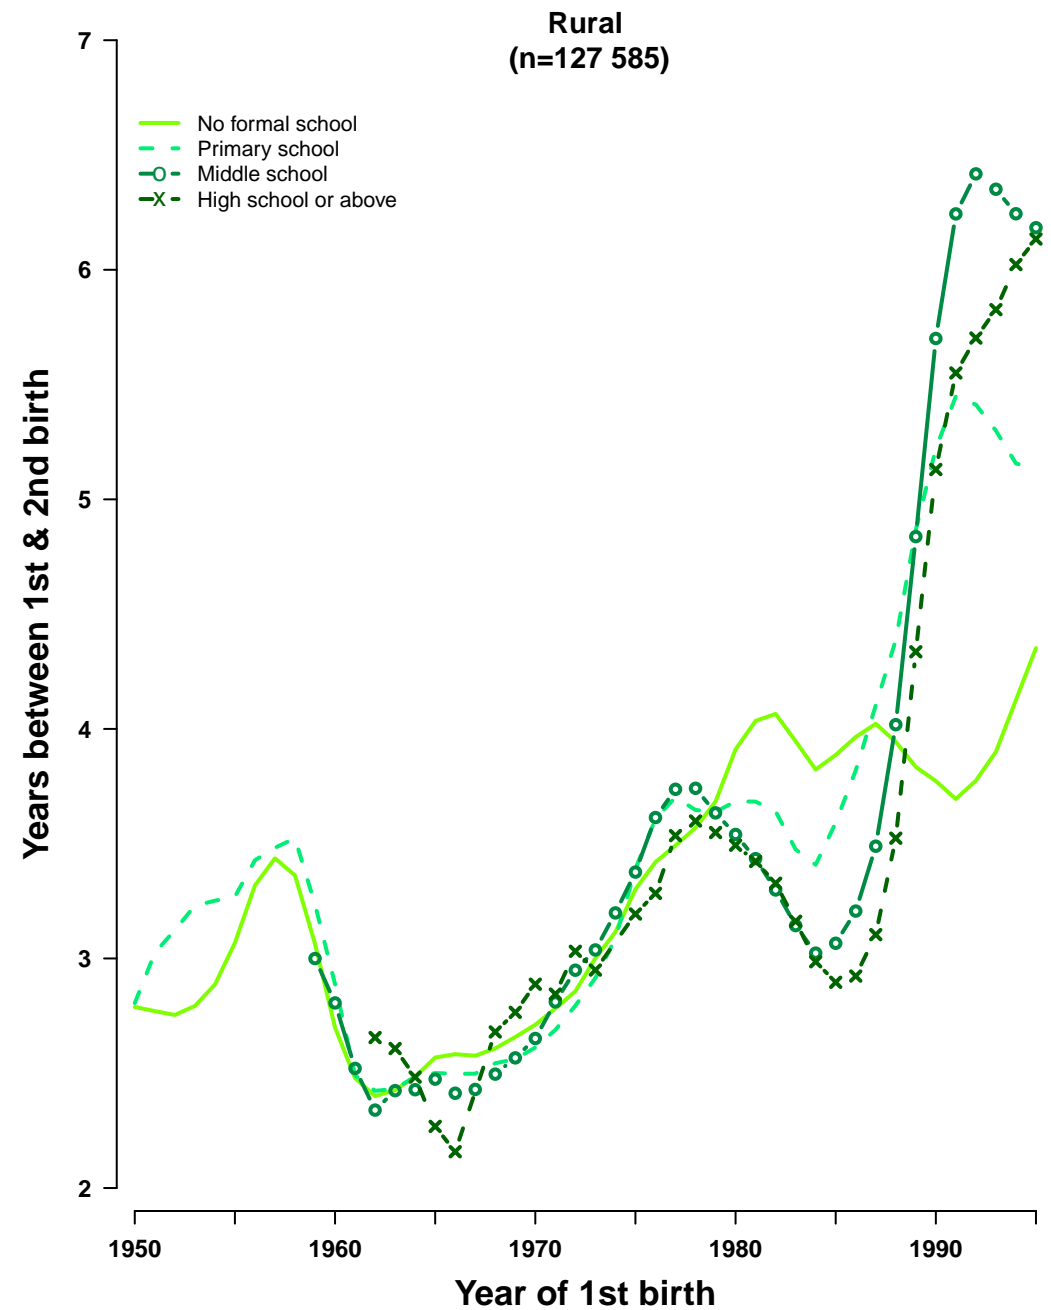

Supplementary Figure 6. Average duration of breast-feeding by year of 1st birth

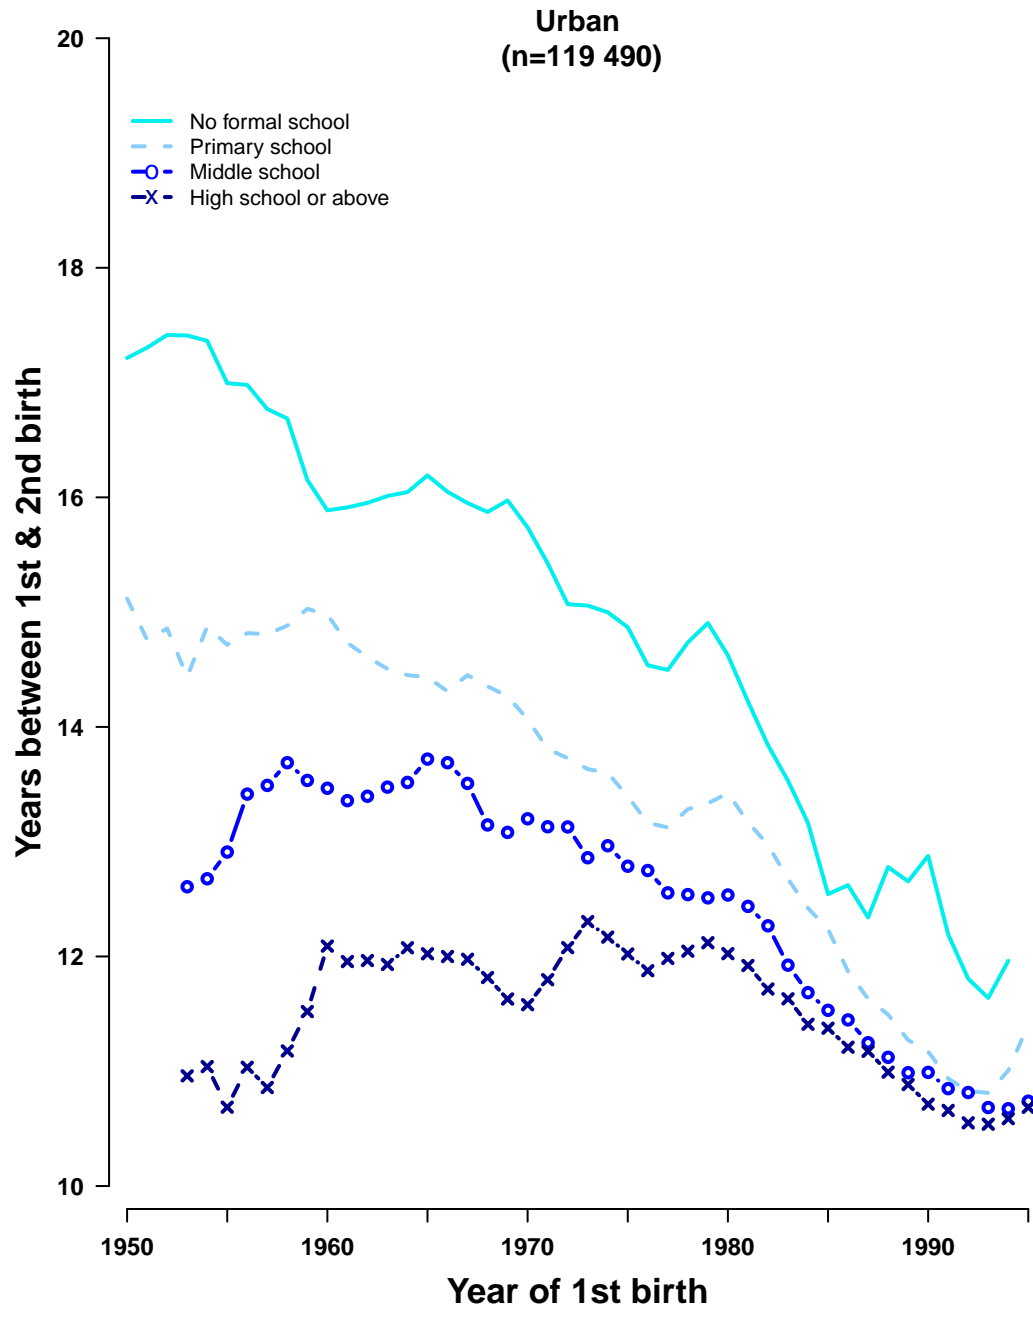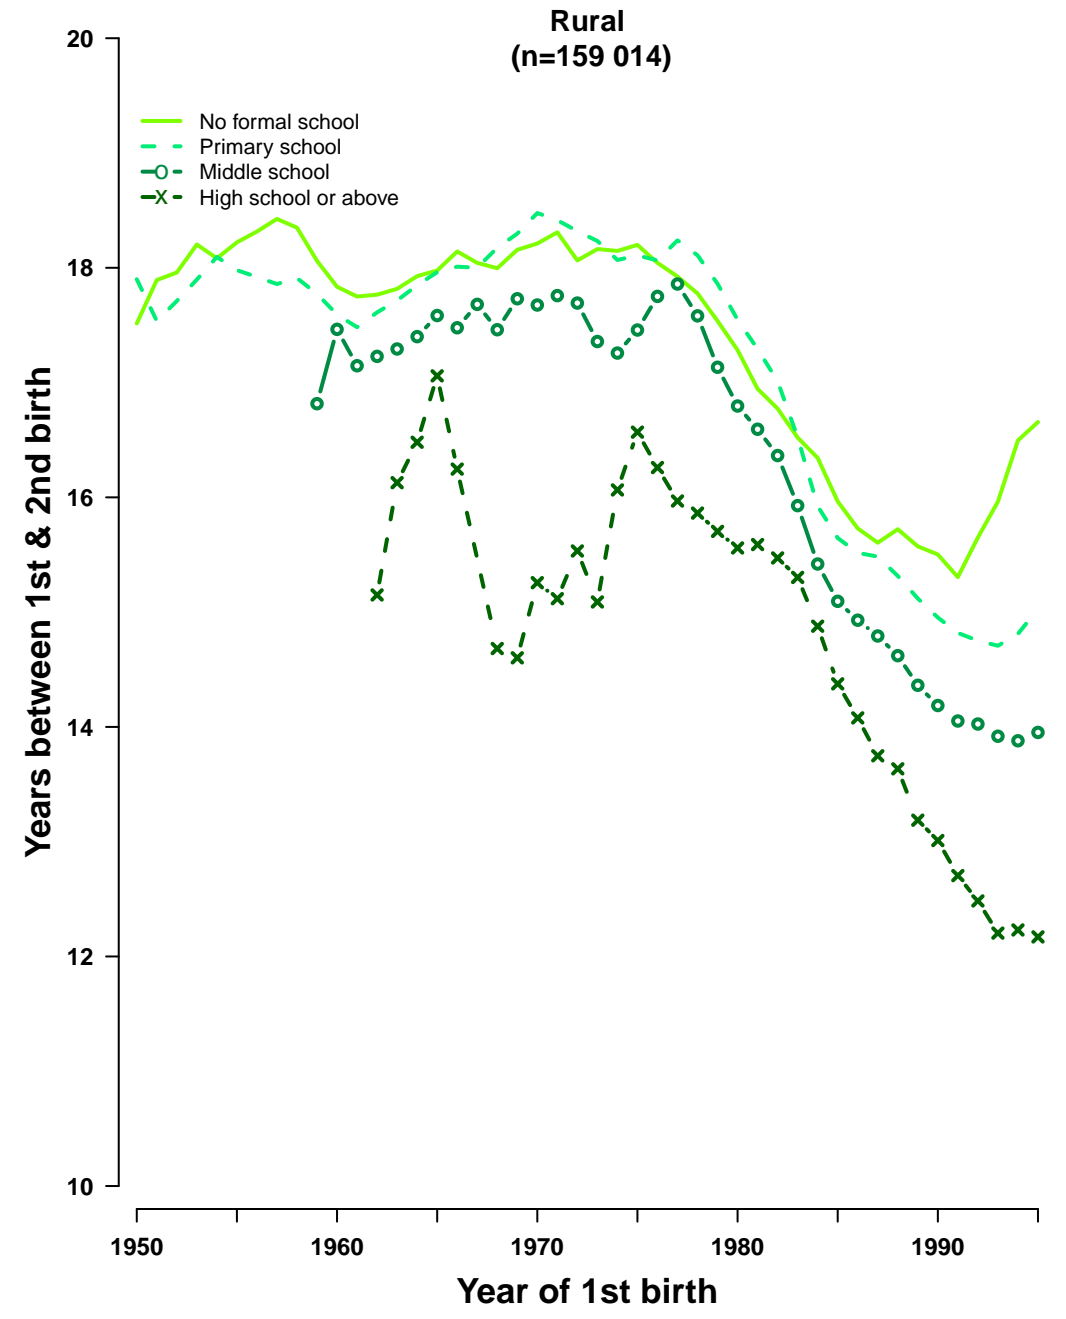



Supplementary Figure 7. Time trends in induced abortion in different regions, by education

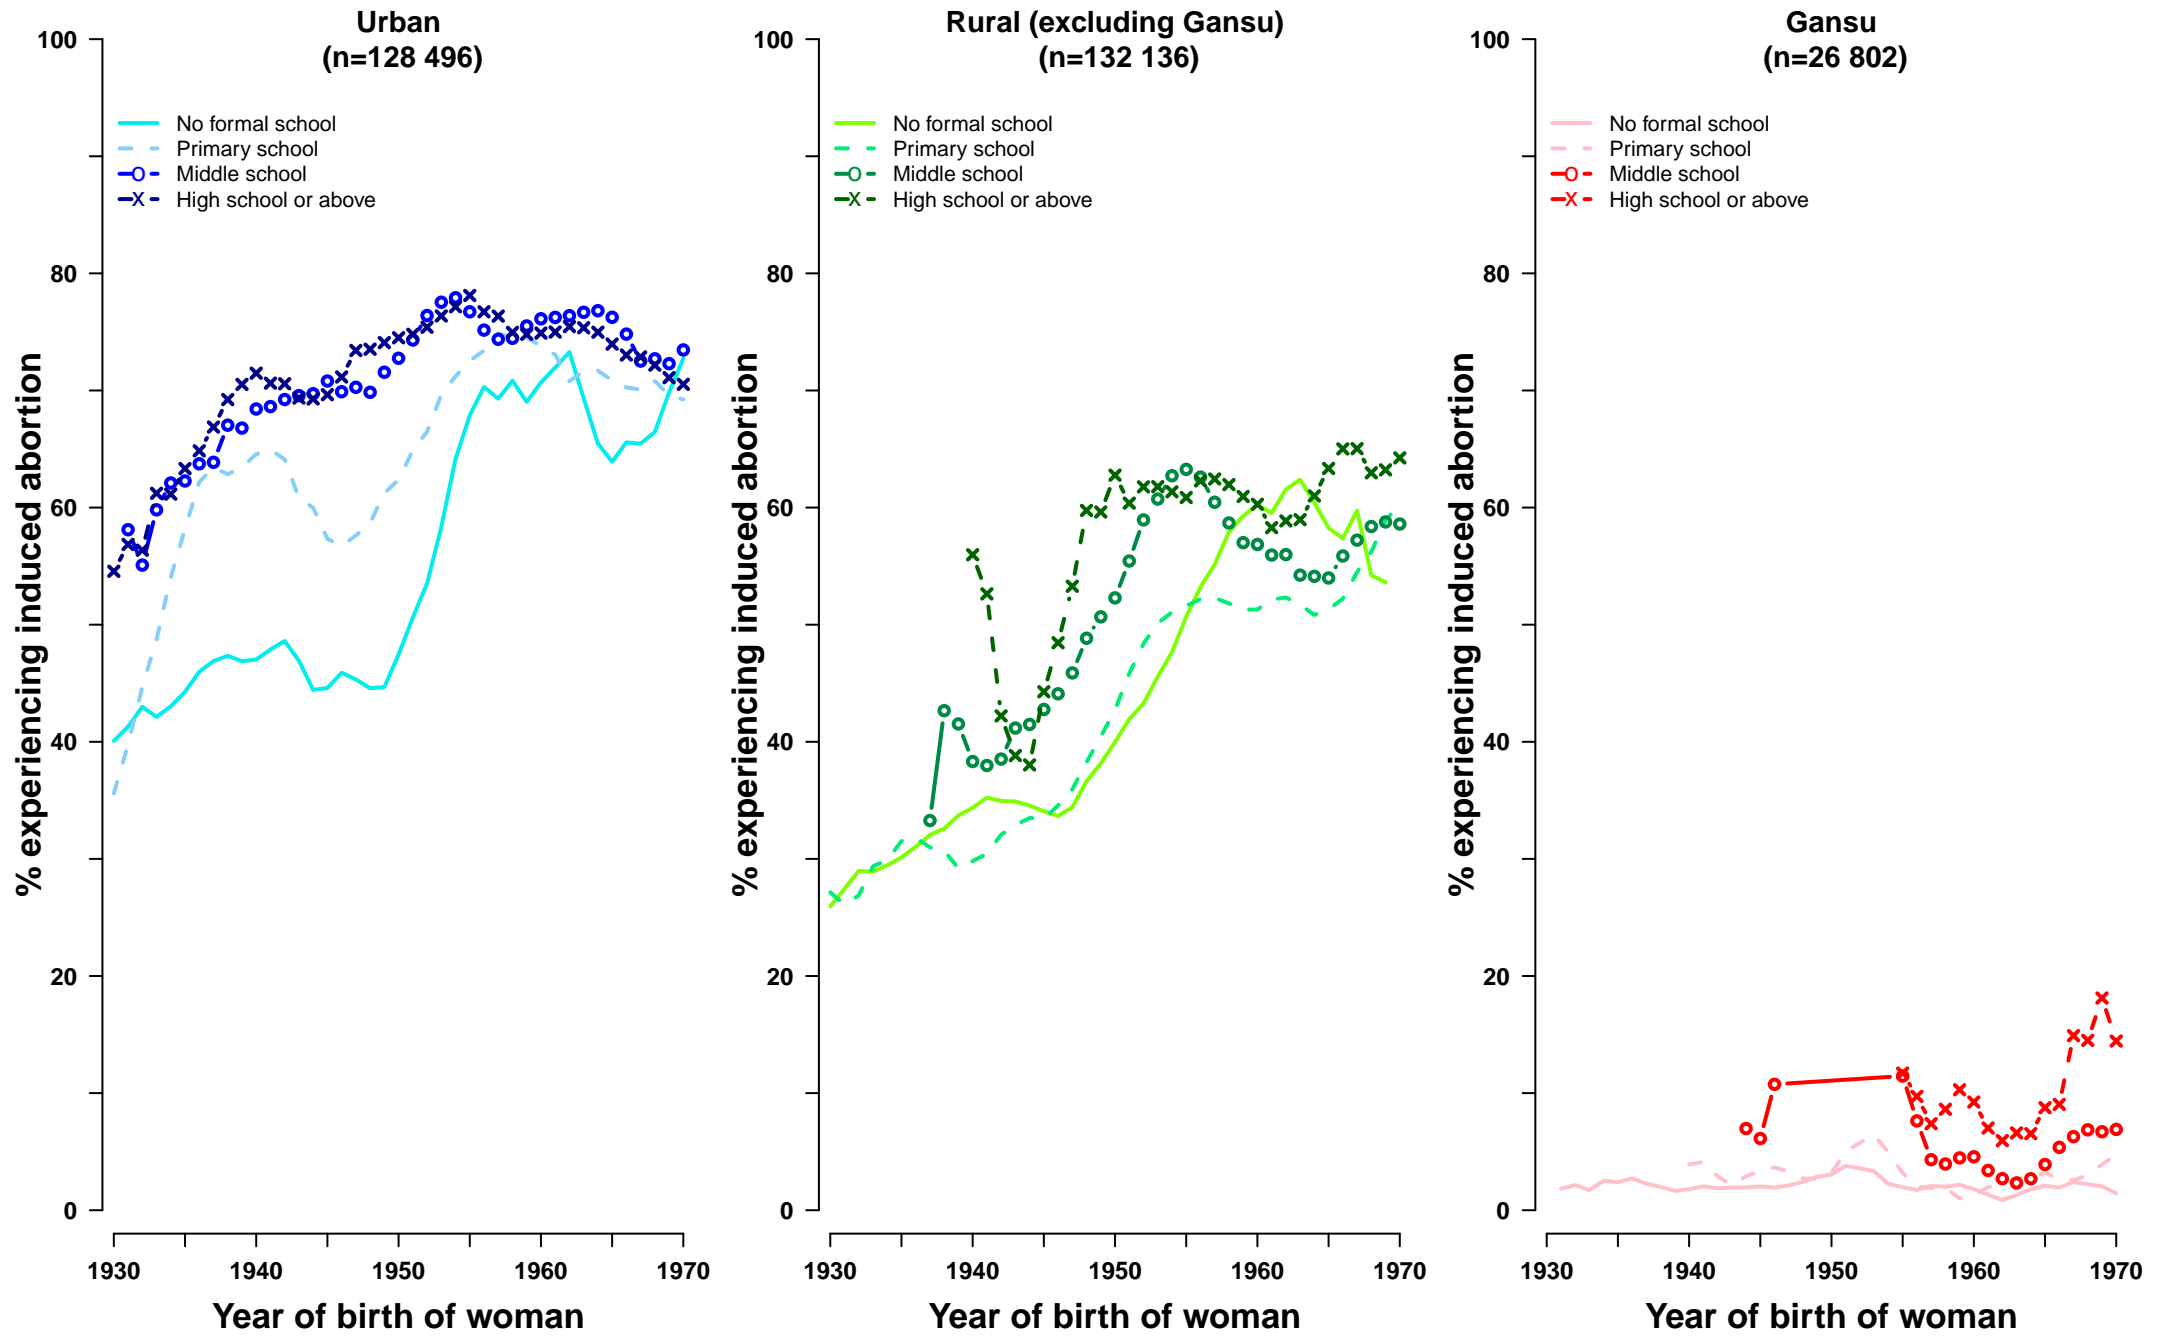

Supplementary Figure 8. Time trends in spontaneous abortion in different regions, by education

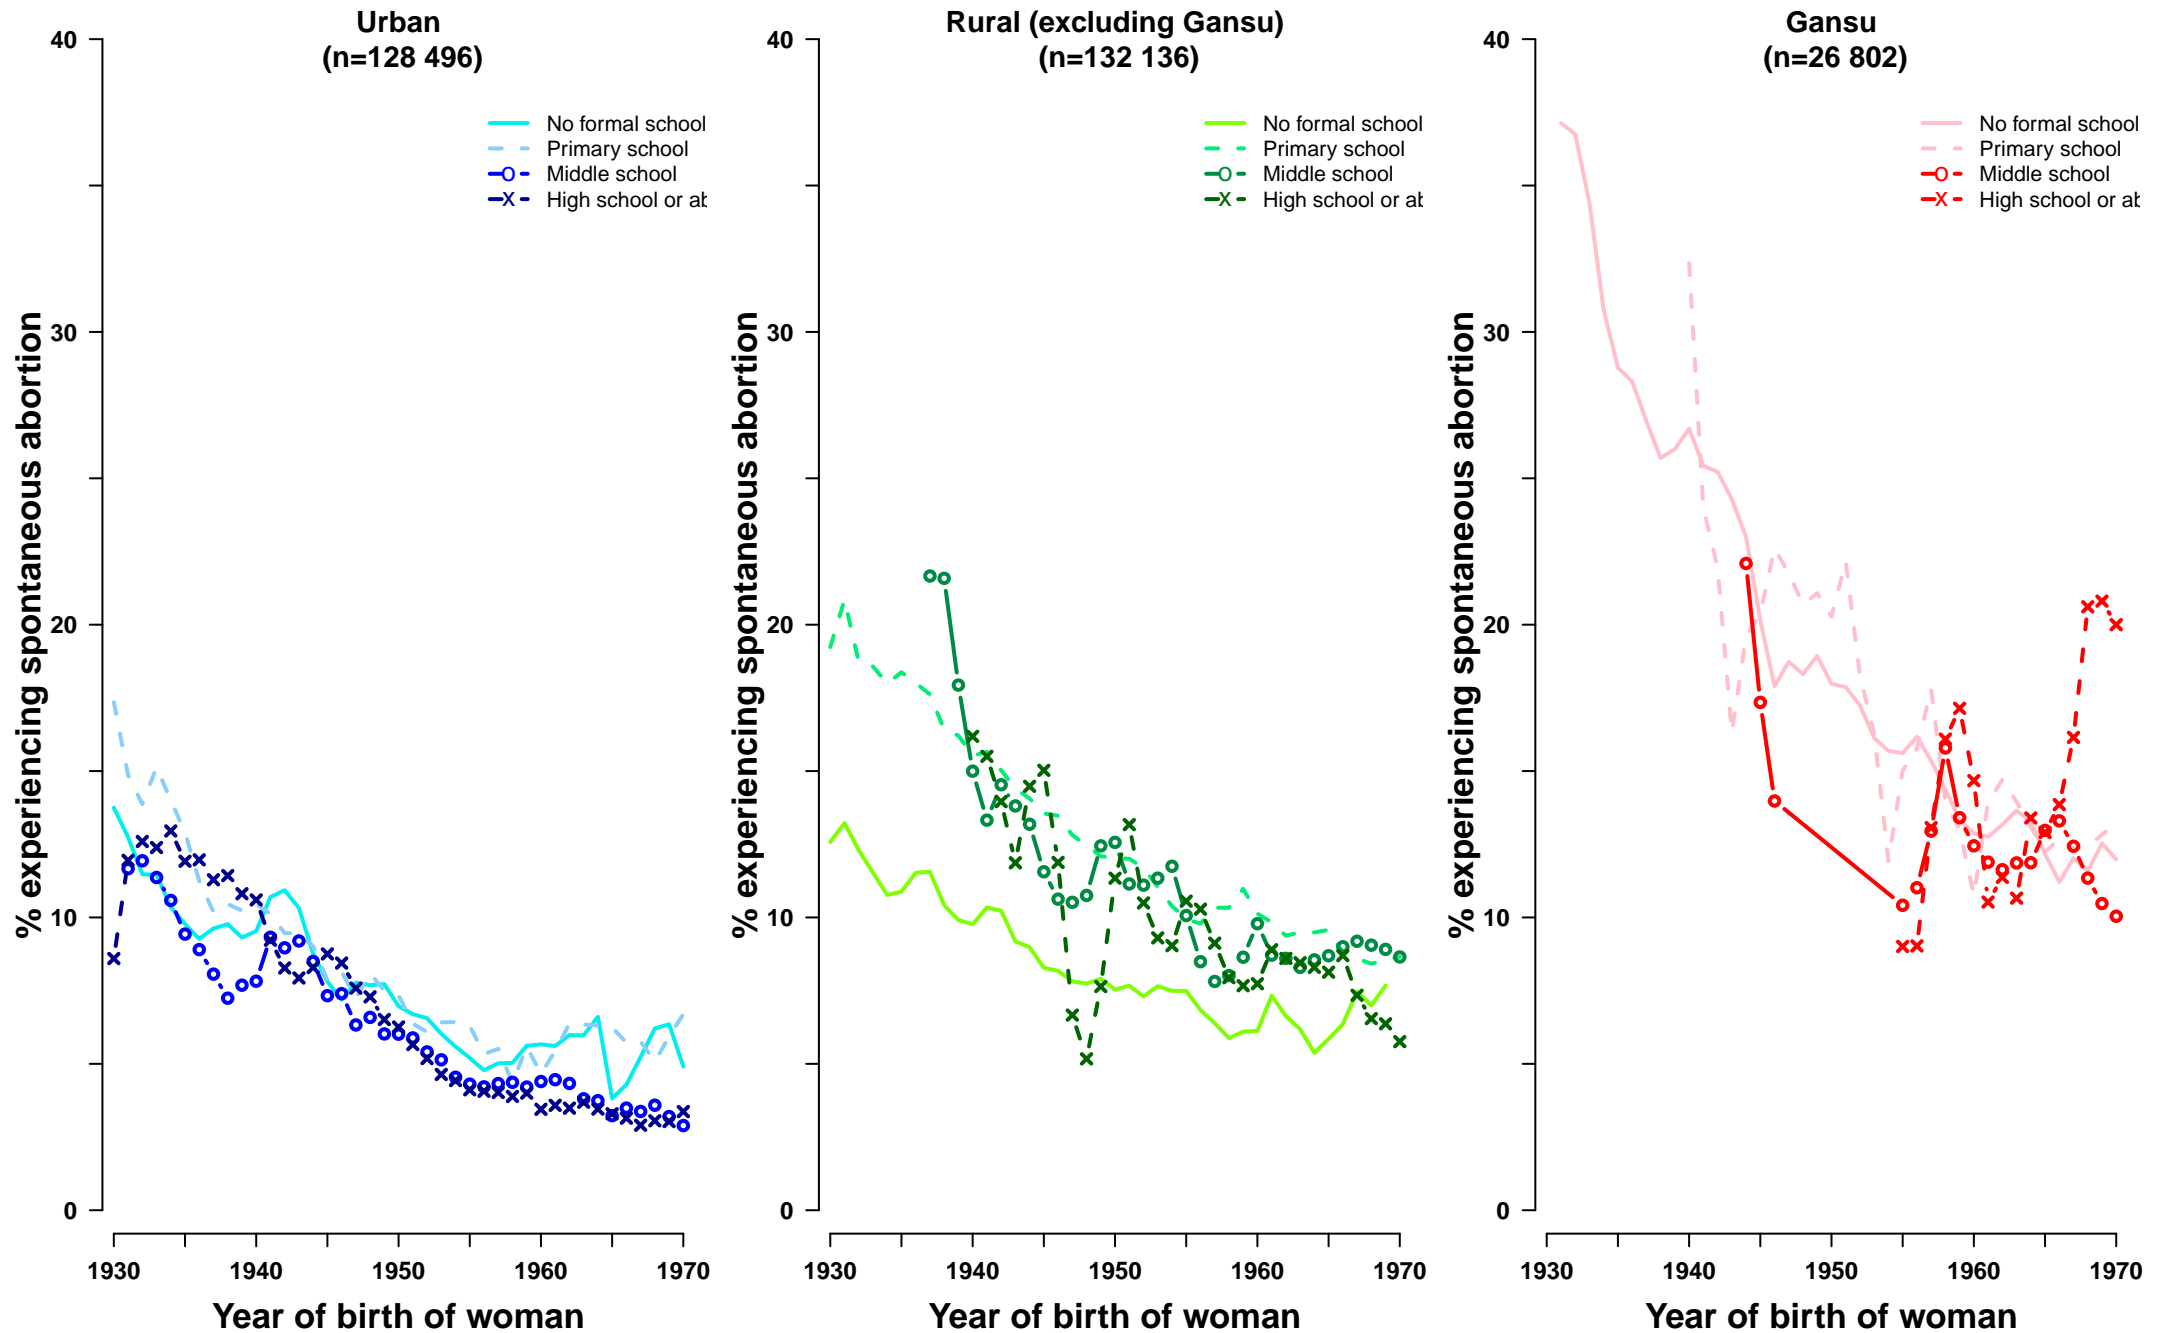

**Supplementary table 1.** Demographic and reproductive characteristics, by area

| Characteristics                        | Area                  |             |             |             |             |                          |             |             |             |             |
|----------------------------------------|-----------------------|-------------|-------------|-------------|-------------|--------------------------|-------------|-------------|-------------|-------------|
|                                        | Urban (North → South) |             |             |             |             | Rural (Coastal → Inland) |             |             |             |             |
|                                        | Harbin                | Qingdao     | Suzhou      | Liuzhou     | Haikou      | Zhejiang                 | Hunan       | Henan       | Sichuan     | Gansu       |
| Number of women                        | 34164                 | 19854       | 30783       | 30640       | 18732       | 33583                    | 33220       | 35192       | 34101       | 30317       |
| Birth cohort, mean (SD)                | 1953 (11.1)           | 1955 (10.3) | 1954 (10.5) | 1953 (10.1) | 1954 (11.6) | 1954 (9.6)               | 1955 (10.2) | 1956 (10.0) | 1955 (10.3) | 1958 (10.5) |
| Age at interview (years), mean (SD)    | 52.6 (11.1)           | 51.0 (10.3) | 51.3 (10.4) | 53.2 (10.1) | 52.0 (11.6) | 51.7 (9.7)               | 50.4 (10.3) | 49.8 (10.0) | 50.2 (10.3) | 47.7 (10.4) |
| Highest education, %                   | 52                    | 31          | 7           | 38          | 30          | 2                        | 7           | 11          | 6           | 4           |
| Age at menarche, mean (SD)             | 15.0 (1.8)            | 15.8 (2.0)  | 15.6 (1.9)  | 14.8 (2.0)  | 15.7 (2.1)  | 15.5 (1.7)               | 15.6 (1.9)  | 15.5 (2.0)  | 15.7 (2.1)  | 15.4 (1.9)  |
| Number with at least one pregnancy     | 33456                 | 19739       | 30610       | 30212       | 18439       | 33379                    | 32999       | 34950       | 33860       | 30145       |
| Number of live birth, mean (SD)        | 1.7 (1.1)             | 1.7 (1.0)   | 1.8 (1.1)   | 2.0 (1.3)   | 2.4 (1.3)   | 2.2 (1.1)                | 2.6 (1.2)   | 2.7 (1.3)   | 2.0 (1.4)   | 3.2 (1.5)   |
| History of induced abortion, %         | 70                    | 58          | 62          | 77          | 68          | 53                       | 33          | 45          | 62          | 3           |
| History of spontaneous abortion, %     | 5.8                   | 3.9         | 5.8         | 7.4         | 8.1         | 5.2                      | 15.5        | 11.5        | 8.4         | 16.0        |
| No history of abortion, %              | 73                    | 61          | 65          | 80          | 72          | 56                       | 44          | 53          | 67          | 19          |
| Number with at least one live birth    | 33085                 | 19691       | 30564       | 29938       | 18335       | 33345                    | 32848       | 34902       | 33806       | 30105       |
| Age at first birth, mean (SD)          | 25.3 (3.3)            | 25.7 (2.4)  | 22.9 (2.6)  | 25.1 (3.5)  | 25.1 (3.6)  | 21.8 (2.7)               | 21.8 (2.6)  | 23.1 (2.4)  | 22.8 (2.6)  | 22.0 (2.6)  |
| Average months of breast feeding, mean | 13.1 (8.1)            | 11.7 (4.8)  | 13.5 (7.3)  | 11.0 (4.5)  | 10.7 (4.0)  | 11.8 (4.9)               | 12.4 (4.4)  | 21.5 (8.4)  | 15.9 (7.7)  | 20.8 (7.2)  |
| Number of postmenopausal women         | 10972                 | 5485        | 8558        | 9981        | 6194        | 10075                    | 8799        | 8387        | 9144        | 6196        |
| Age at menopause mean (SD)             | 49.2 (4.0)            | 49.7 (3.9)  | 48.7 (4.4)  | 49.0 (4.2)  | 48.9 (4.3)  | 49.1 (4.0)               | 48.4 (4.5)  | 48.4 (4.4)  | 48.2 (4.6)  | 47.9 (4.6)  |
